# Supplementary material for: Tribological investigations on β-lactam cephalosporin antibiotics as efficient ashless antiwear additives with low SAPS and their theoretical studies
Source: Royal Society of Chemistry journal article supplement (doi:10.1039/c4ra03596h), 2014-01-01
Supplement: c4ra03596h1.pdf [file c4ra03596h1.pdf]

## SUPPLEMENTARY INFORMATION

on

### **Tribological investigations of $\beta$ -lactum cephalosporin antibiotics as efficient ashless antiwear additives with low SAPS and their theoretical studies**

Kalyani<sup>‡</sup>, Vinay Jaiswal<sup>‡</sup>, Rashmi B. Rastogi<sup>‡\*</sup> and Devendra Kumar<sup>†</sup>

<sup>‡</sup>Department of Chemistry, Indian Institute of Technology (Banaras Hindu University),  
Varanasi-221005, India

<sup>†</sup>Department of Ceramic Engineering, Indian Institute of Technology (Banaras Hindu  
University), Varanasi-221005, India

**Corresponding Author:** Rashmi B. Rastogi

**E-mail:** rashmi.apc@iitbhu.ac.in

**Fax:** +91 542 2368428

## S1. Experimental details

The wear scar diameter of each of the three horizontal balls was measured in two mutually perpendicular directions, one in the sliding direction ( $d_s$ ) and the other perpendicular ( $d_p$ ) to it using an optical microscope. Geometric mean of the two perpendicular diameters on the same ball was taken as given by the equation 1.

For each experiment arithmetic mean of the above diameter of each ball ( $d_1, d_2$  and  $d_3$ ) was taken as given by equation 2. The three stationary balls were not disturbed while taking the readings and the wear scar diameter was taken by tilting eye piece of the microscope at an angle of  $70.5^\circ$  making it perpendicular to the surface of the scar.

### S1.1 Tribological Parameters

#### S1.1.1 Mean wear scar diameter (MWD)

$$d_1 = \sqrt{(d_s d_p)} \quad 1$$

$$d = \frac{d_1 + d_2 + d_3}{3} \quad 2$$

#### S1.1.2 Mean wear volume (MWV)

$$\text{Wear volume, } V = \frac{\Pi d_0^4}{64 r} \left\{ \left( \frac{d}{d_0} \right)^4 - \left( \frac{d}{d_0} \right) \right\} \quad 3$$

$$\text{Hertzian diameter, } d_0 = 2 \left( \frac{3Pr}{4E} \right)^{\frac{1}{3}}$$

$$\text{Where, } \frac{1}{r} = \frac{1}{r_1} + \frac{1}{r_2}$$

$$\frac{1}{E^*} = \frac{1 - \nu_1^2}{E_1} + \frac{1 - \nu_2^2}{E_2}$$

Where,  $E^*$  = Resultant modulus of elasticity

$\nu$  = Poissons ratio

$r$  = Radius of steel ball

$E_1 = E_2 = 206 \text{ GPa}$

$\nu_1 = \nu_2 = 0.3$

$P$  = Actual load in Newton on each of the three horizontal balls that is 0.408 times of applied load.

### S1.1.3 Friction coefficient ( $\mu$ )

The coefficient of friction for different antiwear additives is calculated from the pattern observed on the friction paper with the help of equation 4.

$$\mu = \frac{0.222F}{r} \cdot \frac{L}{P} \quad 4$$

$$L/P = 0.628$$

$$r = 0.367 \text{ mm}$$

$$F = \frac{\text{spring constant}}{6} \times Y$$

Where,  $F$  = Friction force in kgf exerted on the indicator spring.

$L$  = Length in mm of the torque-lever arm.

$r$  = Distance of contact surface of balls from the axis of rotation (0.367 mm).

$Y$  = Displacement after 2.5 s from the baseline.

Value of spring constant upto 80 kgf is 0.226 kgf/cm.

### S1.1.4 Wear rate

Overall, running-in and steady-state wear rate have been calculated on the basis of observed mean wear volume data at different time intervals. Mean wear volumes at different times (15,

30, 45, 60, 75 and 90 min.) for each experiment were plotted with time and a linear regression model was fitted on the points including origin to find out overall wear rate.

$$\frac{V}{l} = K \frac{P}{H}$$

V = mean wear volume

l = sliding distance ( $2\pi r.N$ )

K = wear coefficient

H = hardness of steel ball (59-61 HRC)

P = applied load (0.408x392N)

## S1.2 AFM Roughness Parameters

### S1.2.1 Line Roughness:

$$\text{Roughness Average, } R_a = \frac{1}{N} \sum_{l=0}^{N-1} |z(x_l)|$$

$$\text{Root Mean Square, } R_q = \sqrt{\frac{1}{N} \sum_{l=0}^{N-1} z(x_l)^2}$$

$$\text{Peak-Valley Height, } R_y = A_p - A_v$$

$$\text{Peak-Height, } R_p = \text{Highest value}$$

$$\text{Valley Depth, } R_v = \text{Lowest value}$$

$$\text{Mean Value, } R_m = \frac{1}{N} \sum_{l=0}^{N-1} z(x_l)$$

### S1.2.2 Area Roughness:

$$\text{Roughness Average, } S_a = \frac{1}{MN} \sum_{k=0}^{M-1} \sum_{l=0}^{N-1} |z(x_k, y_l)|$$

Root Mean Square,  $S_q = \sqrt{\frac{1}{MN} \sum_{k=0}^{M-1} \sum_{l=0}^{N-1} (z(x_k, y_l))^2}$

Peak-Valley Height,  $S_y = S_p - S_v$

Peak-Height,  $S_p =$  Highest value

Valley Depth,  $S_v =$  Lowest value

Mean Value,  $S_m = \frac{1}{MN} \sum_{k=0}^{M-1} \sum_{l=0}^{N-1} z(x_k, y_l)$

**Table S1.** Tribological parameters for paraffin oil in the presence and absence of  $\beta$ -lactum antiwear additives (1% w/v) for different time duration at 392N applied load

| S.N. | Additive     | Time (min)  |                                            |             |                                            |             |                                            |             |                                            |             |                                            |             |                                            |
|------|--------------|-------------|--------------------------------------------|-------------|--------------------------------------------|-------------|--------------------------------------------|-------------|--------------------------------------------|-------------|--------------------------------------------|-------------|--------------------------------------------|
|      |              | 15          |                                            | 30          |                                            | 45          |                                            | 60          |                                            | 75          |                                            | 90          |                                            |
|      |              | MWD<br>(mm) | MWV<br>(10 <sup>-4</sup> mm <sup>3</sup> ) |
| 1.   | Paraffin oil | 0.622       | 20.548                                     | 0.703       | 34.829                                     | 0.735       | 42.152                                     | 0.781       | 54.177                                     | 0.815       | 64.647                                     | 0.929       | 111.280                                    |
| 2.   | ZDDP         | 0.411       | 02.698                                     | 0.556       | 12.457                                     | 0.594       | 16.821                                     | 0.630       | 21.728                                     | 0.678       | 29.843                                     | 0.685       | 31.184                                     |
| 3.   | Cefixime     | 0.469       | 05.525                                     | 0.510       | 08.333                                     | 0.551       | 11.924                                     | 0.580       | 15.078                                     | 0.619       | 20.117                                     | 0.661       | 26.758                                     |
| 4.   | Cephalexin   | 0.479       | 06.143                                     | 0.578       | 14.846                                     | 0.642       | 23.587                                     | 0.679       | 30.032                                     | 0.703       | 34.829                                     | 0.742       | 43.695                                     |
| 5.   | Cefadroxil   | 0.471       | 05.645                                     | 0.531       | 10.078                                     | 0.581       | 15.113                                     | 0.613       | 19.275                                     | 0.647       | 24.394                                     | 0.681       | 30.412                                     |

MWD= Mean wear scar diameter, MWV = Mean wear volume

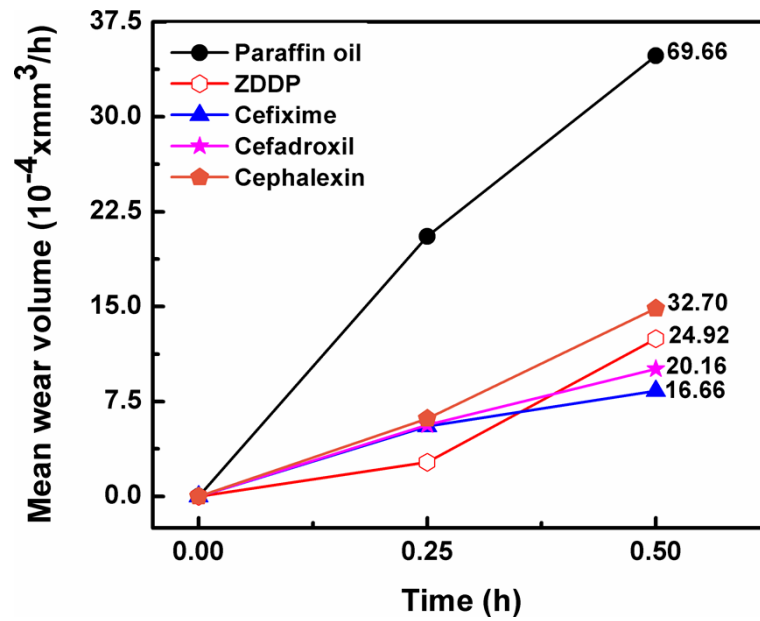

**Fig. S1.** Determination of running-in wear rate by varying mean wear volume with time (h) in paraffin oil containing (1% w/v) zinc dibutyldithiophosphate and  $\beta$ -lactum additives at 392N applied load

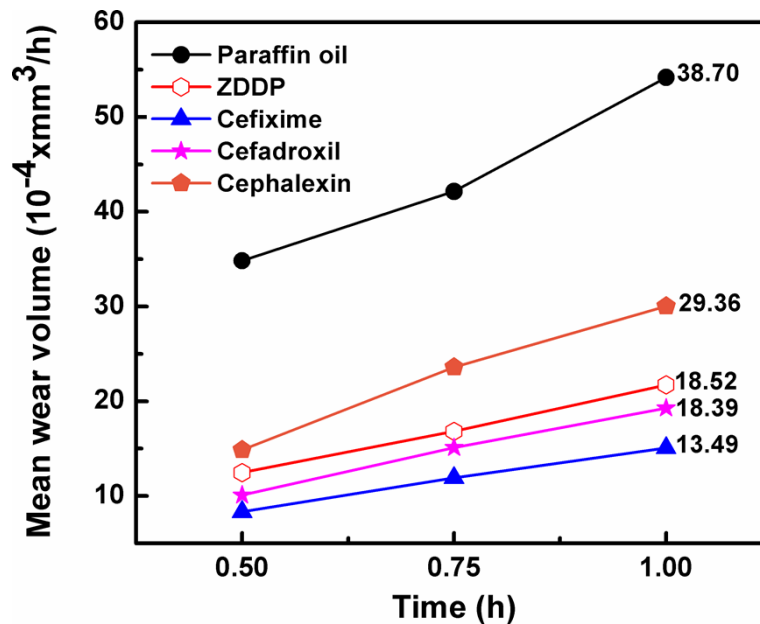

**Fig. S2.** Determination of steady-state wear rate by varying mean wear volume with time (h) in paraffin oil containing (1% w/v) zinc dibutyldithiophosphate and  $\beta$ -lactum additives at 392N applied load

**Table S2.** Tribological parameters for paraffin oil in the absence and presence of  $\beta$ -lactum antiwear additives (1% w/v) at different loads and for 30 min test duration.

| S.N. | Additive     | Applied Load (N) |       |             |       |             |       |             |       |             |       |             |       |
|------|--------------|------------------|-------|-------------|-------|-------------|-------|-------------|-------|-------------|-------|-------------|-------|
|      |              | 294              |       | 392         |       | 490         |       | 588         |       | 686         |       | 784         |       |
|      |              | MWD<br>(mm)      | $\mu$ | MWD<br>(mm) | $\mu$ | MWD<br>(mm) | $\mu$ | MWD<br>(mm) | $\mu$ | MWD<br>(mm) | $\mu$ | MWD<br>(mm) | $\mu$ |
| 1.   | Paraffin oil | 0.622            | 0.180 | 0.699       | 0.187 | 0.744       | 0.190 | Fails       |       |             |       |             |       |
| 2.   | ZDDP         | 0.499            | 0.150 | 0.566       | 0.160 | 0.622       | 0.165 | 0.6440      | 0.180 | Fails       |       |             |       |
| 3.   | Cefixime     | 0.469            | 0.135 | 0.491       | 0.142 | 0.502       | 0.149 | 0.5190      | 0.154 | 0.590       | 0.157 | 0.6128      | 0.180 |
| 4.   | Cefadroxil   | 0.468            | 0.142 | 0.491       | 0.153 | 0.524       | 0.158 | 0.5606      | 0.161 | 0.611       | 0.172 | 0.7370      | 0.193 |
| 5.   | Cephalexin   | 0.502            | 0.165 | 0.522       | 0.169 | 0.539       | 0.172 | 0.5850      | 0.178 | 0.633       | 0.192 | Fails       |       |

MWD= Mean wear scar diameter,  $\mu$ = friction coefficient



**Fig. S3a**

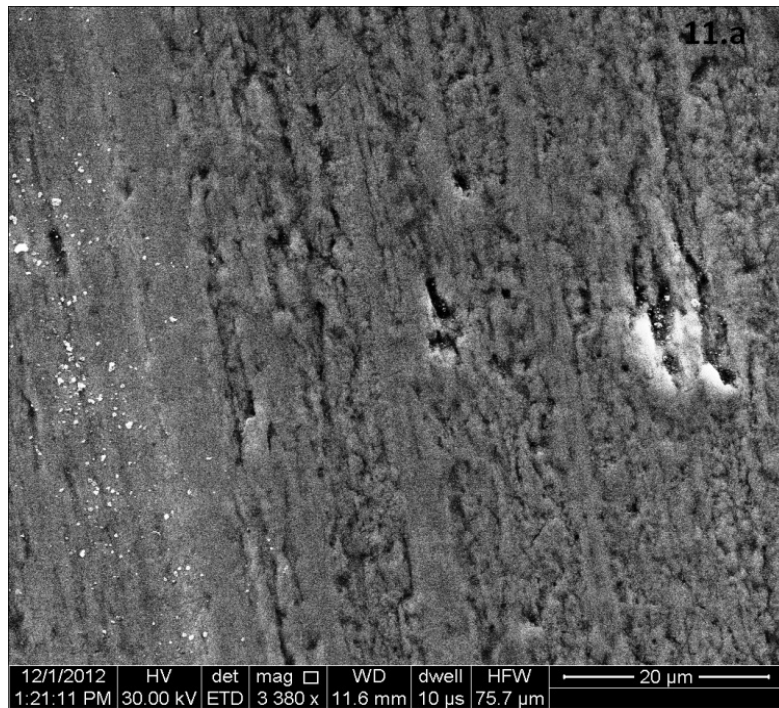

**Fig. S3b**

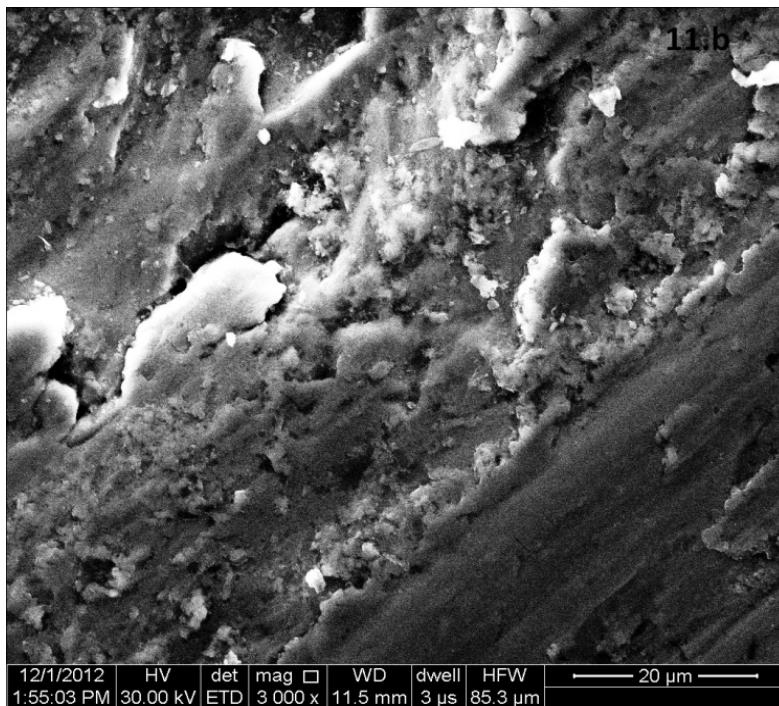

**Fig. S3.** SEM micrographs of the worn steel surface lubricated with, (a) cefixime and (b) ZDDP (1% w/v) in paraffin oil for 30 min test duration at 588 N applied load

Fig. S4a

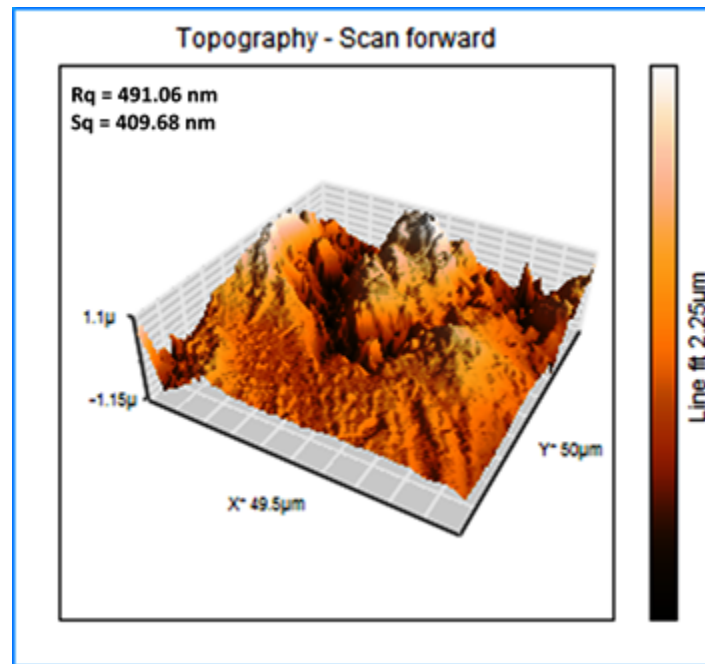

Fig. S4b

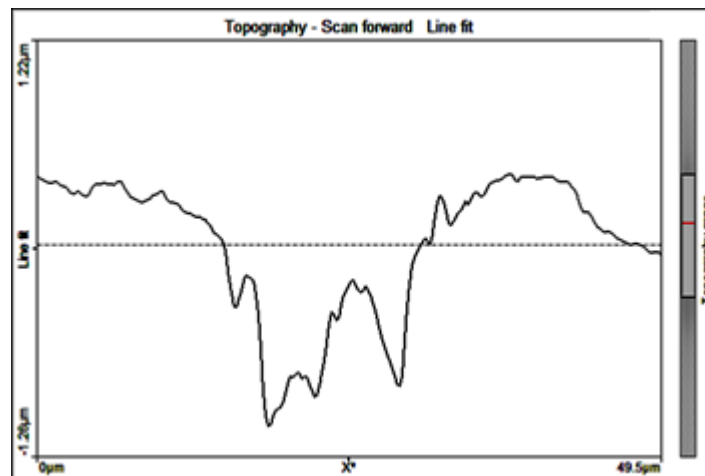

Fig. S4c

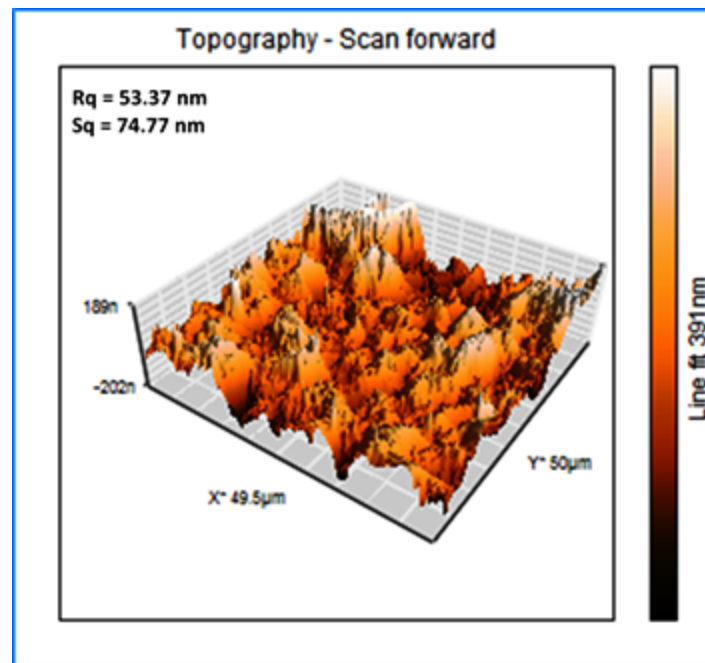

Fig. S4d

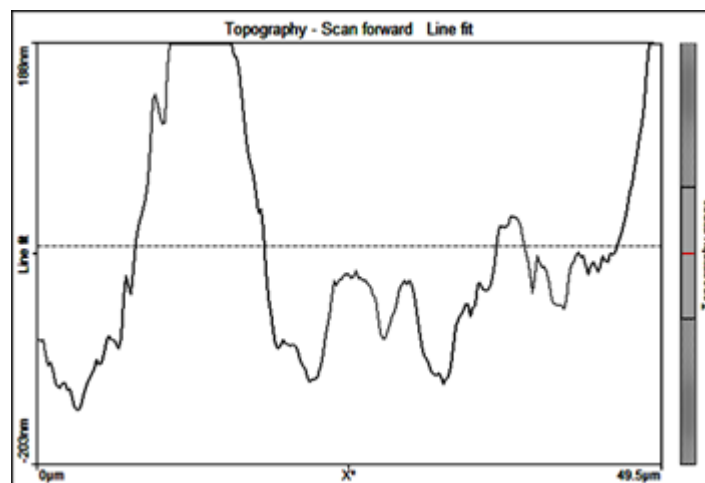

Fig. S4e

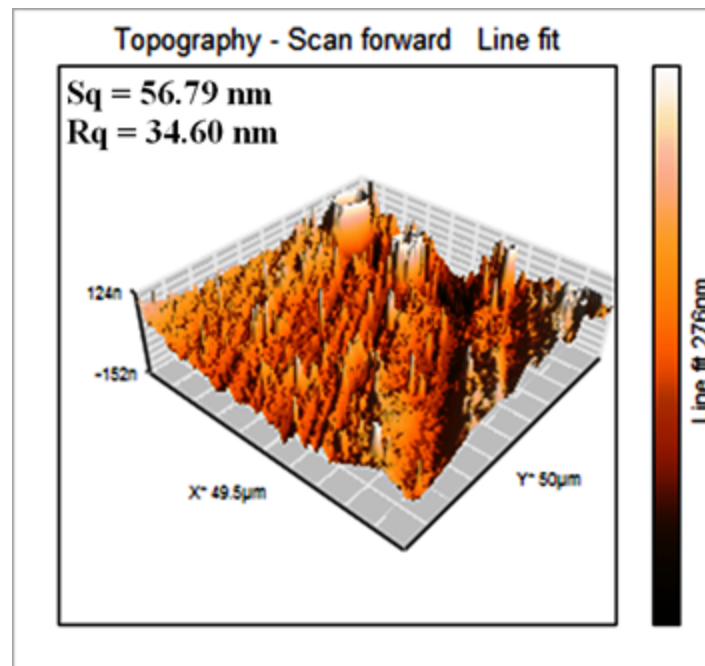

Fig. S4f

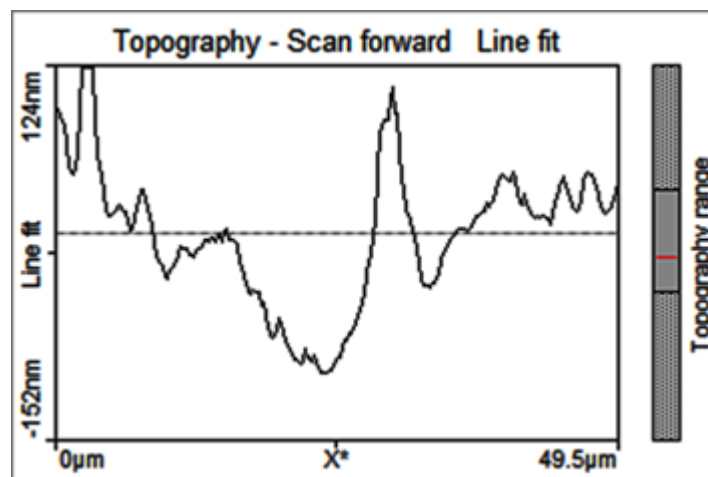

Fig. S4g

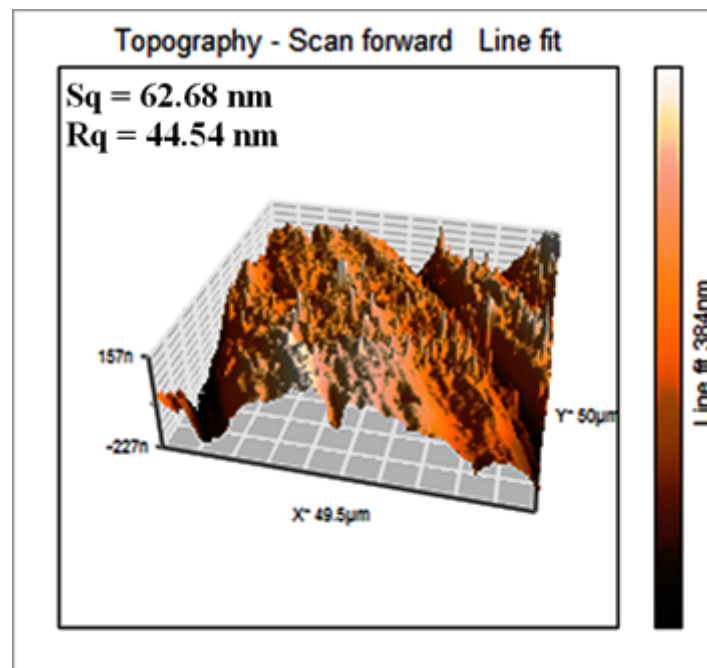

Fig. S4h

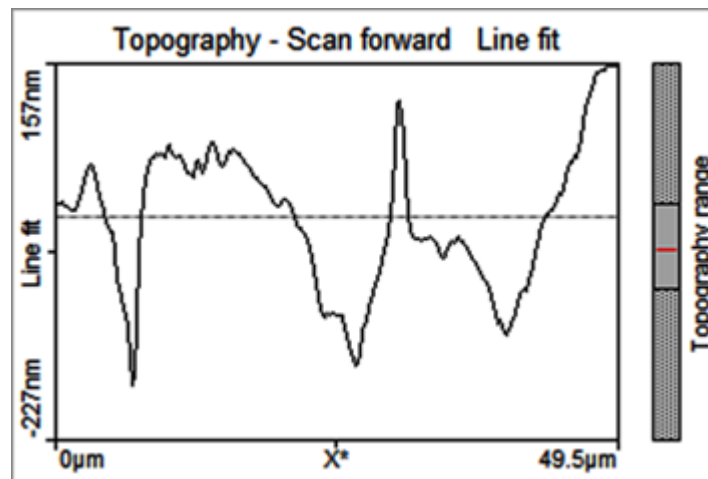

Fig. S4i

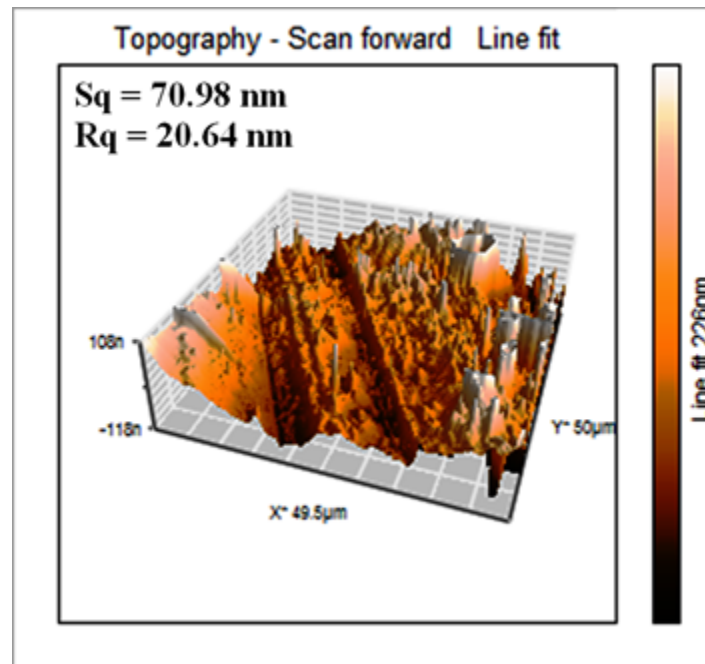

Fig. S4j

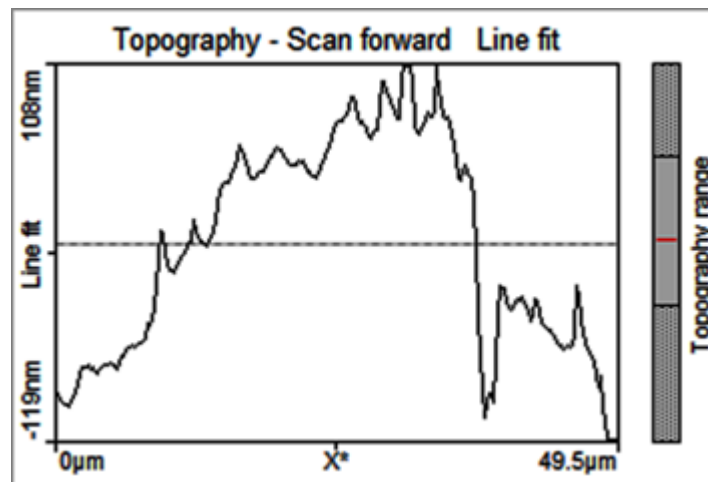

Fig. S4. 3D-AFM images and corresponding line profile graphs of the worn steel surface lubricated with  $\beta$ -lactum additives (1% w/v) in paraffin oil for 90 min test duration at 392 N applied load: (a,b) Paraffin oil, (c,d) Zinc dibutyldithiophosphate, (e,f) Cefixime, (g,h) Cefadroxil and (i,j) Cephalexin

**Table S3.** Surface Roughness parameters obtained from digital processing software of Nanosurf-basic Scan 2 for paraffin oil with and without additives at 392 N load for 90 min test duration.

| <b>Roughness Parameters</b> | <b>Paraffin oil</b> | <b>ZDDP</b> | <b>Cefixime</b> | <b>Cefadroxil</b> | <b>Cephalexin</b> |
|-----------------------------|---------------------|-------------|-----------------|-------------------|-------------------|
| <b>Area Roughness</b>       |                     |             |                 |                   |                   |
| <b>2.496 nm<sup>2</sup></b> |                     |             |                 |                   |                   |
| Sa                          | 298.03nm            | 56.24nm     | 35.43nm         | 46.53nm           | 56.79nm           |
| Sq                          | 409.68nm            | 74.77nm     | 56.79nm         | 62.68nm           | 68.60nm           |
| Sy                          | 2.63μm              | 635.20nm    | 926.51nm        | 508.64nm          | 517.15nm          |
| Sp                          | 1153.30nm           | 369.75nm    | 741.26nm        | 250.39nm          | 294.91nm          |
| Sv                          | -1471.70nm          | -265.45nm   | -185.15nm       | -258.25nm         | -222.24nm         |
| Sm                          | 174.66pm            | 111.74pm    | 143.6pm         | 128.73pm          | 150.75pm          |
| <b>Line Roughness</b>       |                     |             |                 |                   |                   |
| Ra                          | 422.98nm            | 38.97nm     | 28.84nm         | 33.30nm           | 61.11nm           |
| Rq                          | 491.06nm            | 53.37nm     | 34.60nm         | 44.54nm           | 74.12nm           |
| Ry                          | 1568.70nm           | 272.98nm    | 176.97nm        | 245.27nm          | 309.42nm          |
| Rp                          | 713.49nm            | 151.87nm    | 114.31nm        | 117.37nm          | 187.62nm          |
| Rv                          | -855.20nm           | -121.11nm   | -62.65nm        | -127.89nm         | -121.80nm         |
| Rm                          | -167.91pm           | -215.64pm   | -185.81pm       | -195.19pm         | -178.14pm         |

Fig. S5a

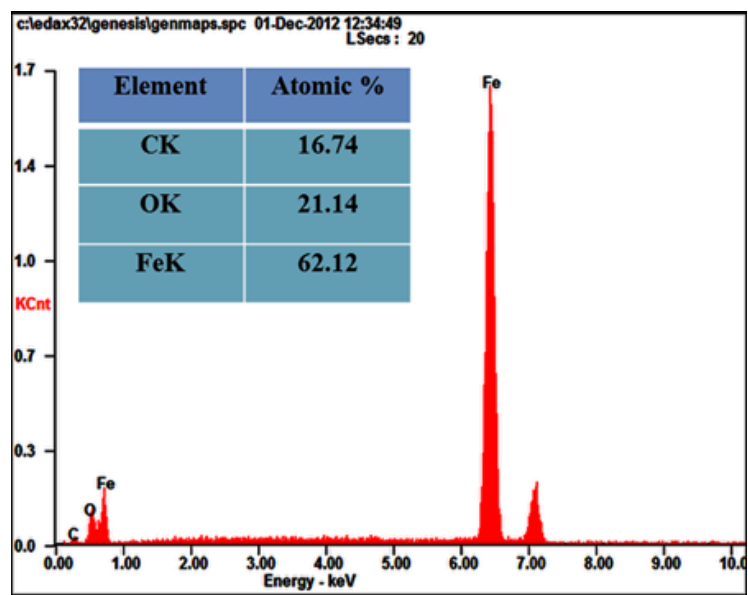

Fig. S5b

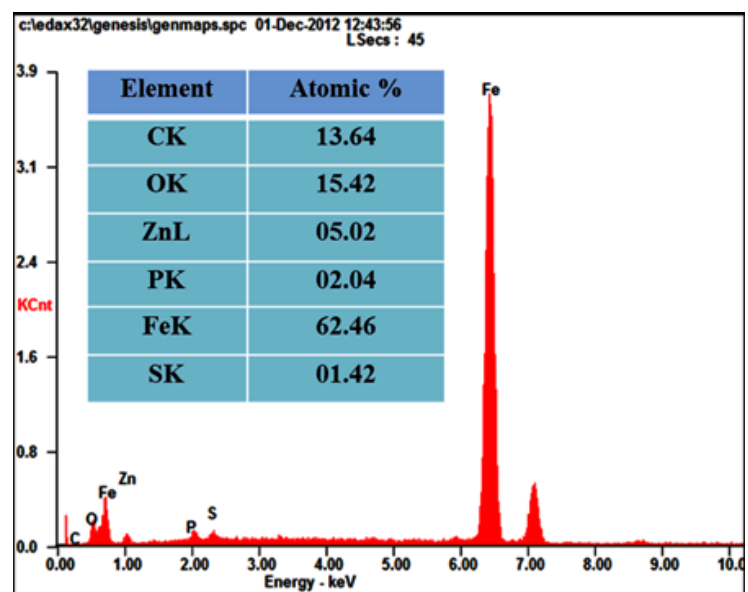



Fig. S5c

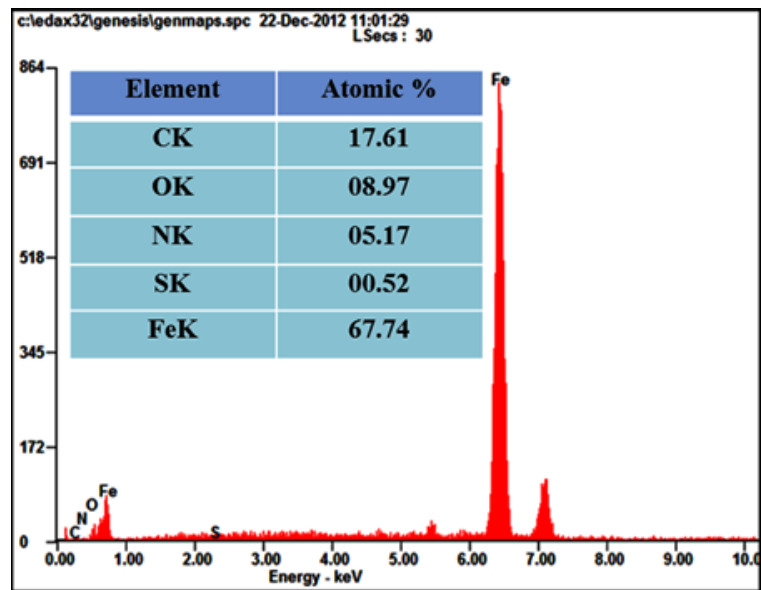

Fig. S5. EDX analysis data of the worn steel surface lubricated with paraffin oil in presence and absence of additives (1% w/v) for 90 min test duration at 392 N applied load: (a) Paraffin oil, (b) Zinc dibutyldithiophosphate (ZDDP) and (c) Cefixime

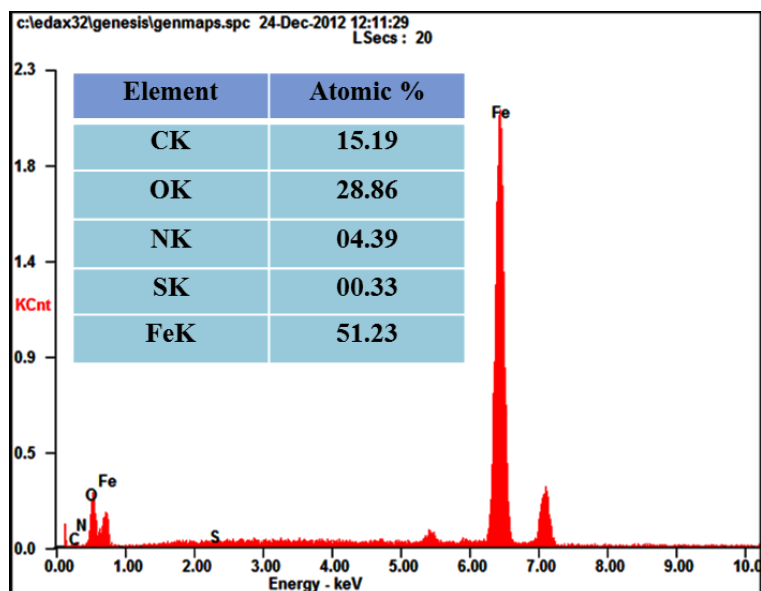

Fig. S6. EDX analysis data of the worn steel surface lubricated with paraffin oil in presence cefixime additives (1% w/v) for 30 min test duration at 588 N applied load
